# Supplementary material
Source: PubMed Central journal article supplement (PMC1783398)

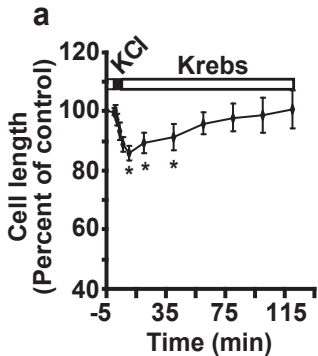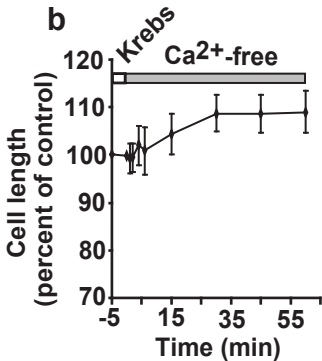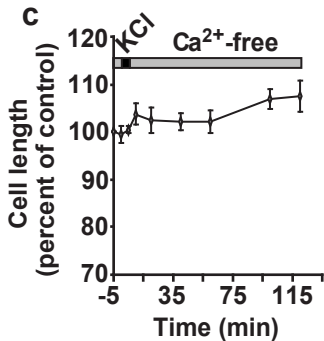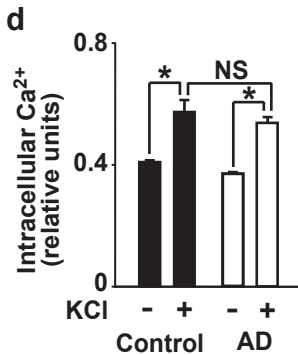

Supplement: pnas_0608251104_1.pdf [file pnas_0608251104_1.pdf]

**a**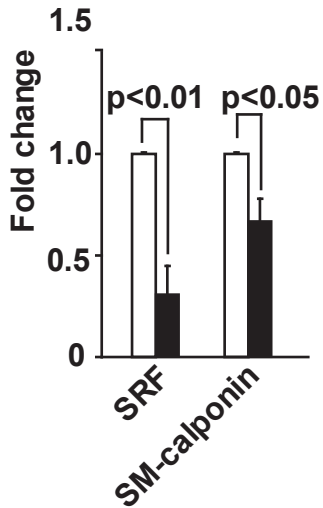**b**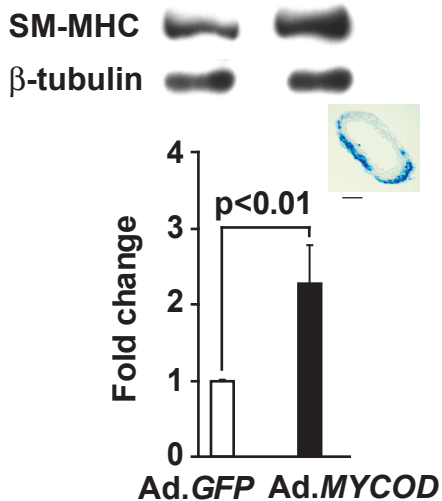

Supplement: pnas_0608251104_2.pdf [file pnas_0608251104_2.pdf]

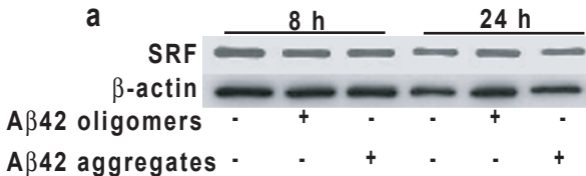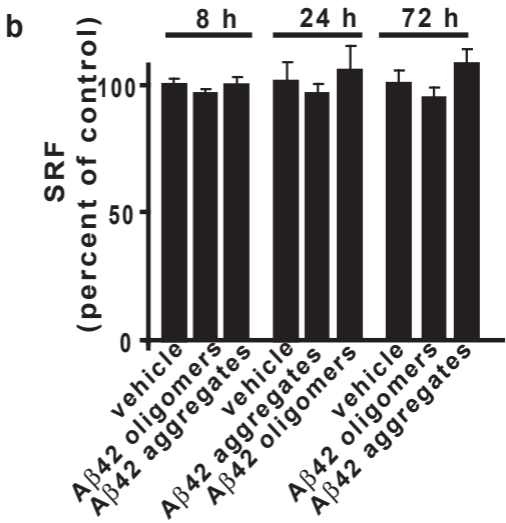

Supplement: pnas_0608251104_3.pdf [file pnas_0608251104_3.pdf]

**a**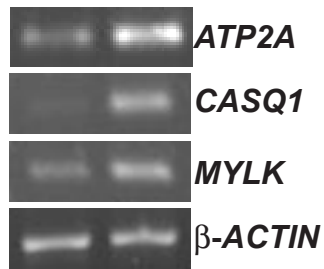

Ad.GFP  
Ad.MYOCD

**b**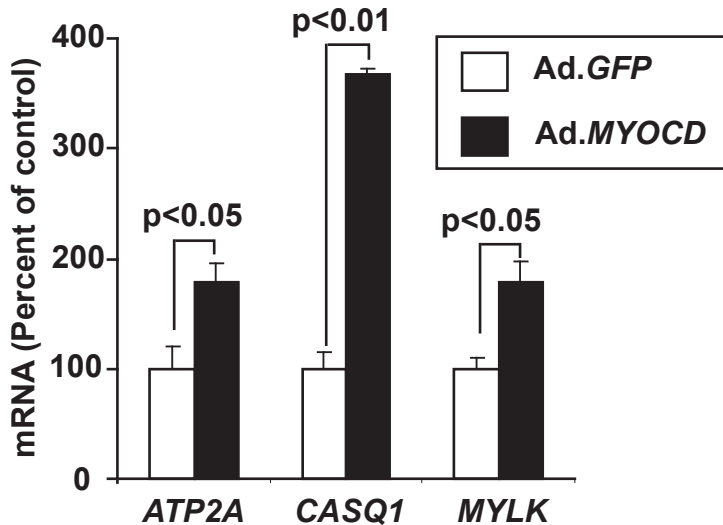

Supplement: pnas_0608251104_4.pdf [file pnas_0608251104_4.pdf]

**a**

**MYOCD mRNA**

**(Percent of control)**

**300**  
**200**  
**100**  
**0**

**p < 0.05**

**Control**  
**Hypoxia**

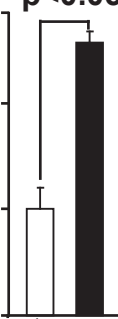

Supplement: pnas_0608251104_5.pdf [file pnas_0608251104_5.pdf]

Normalized Luciferase

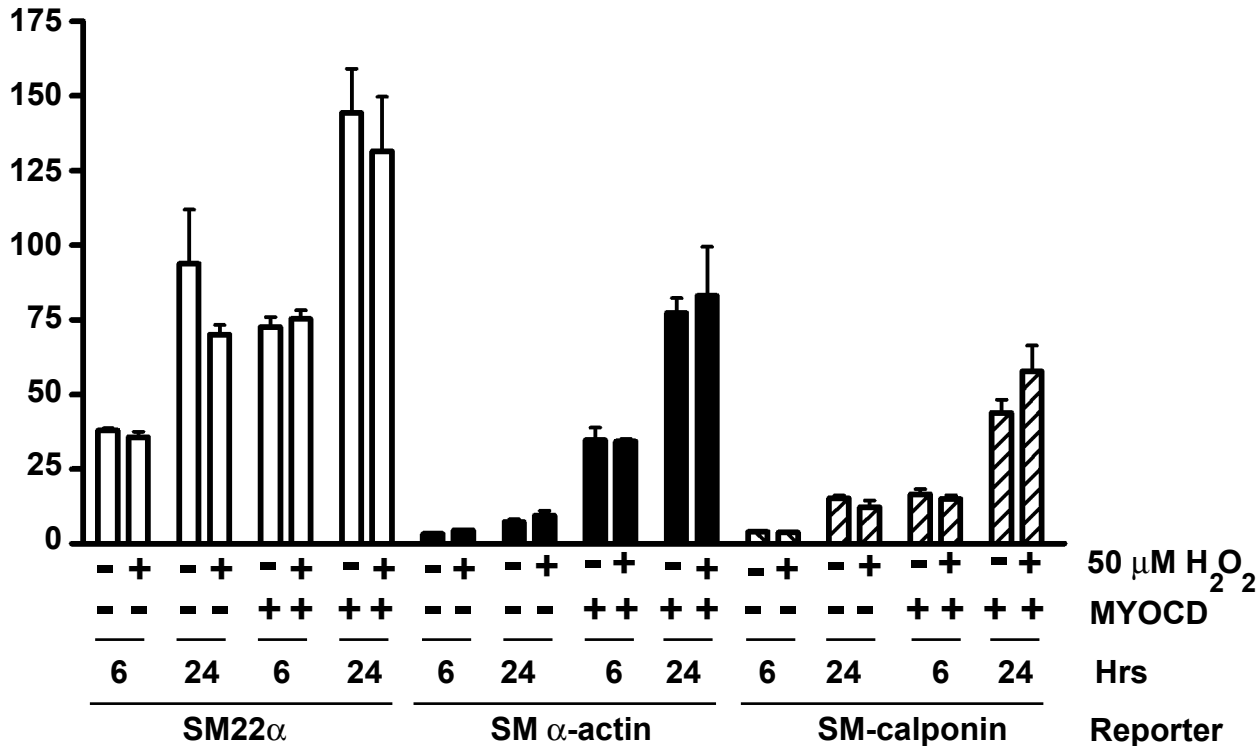

Supplement: pnas_0608251104_6.pdf [file pnas_0608251104_6.pdf]
